# Supplementary material for: Assessment of age, gender, and anxiety on ECG waveform morphology in a large population of domestic dogs
Source: PubMed Central journal article supplement (PMC9072377; doi:10.1038/s41598-022-11378-3), 2022-05-05
Supplement: 41598_2022_11378_MOESM1_ESM.pdf [file 41598_2022_11378_MOESM1_ESM.pdf]

**APPENDIX:****Supplementary Table 1.** Attribute plot for exclusion criteria.

| Exclusion Criteria       | Percent | N      |
|--------------------------|---------|--------|
| Abnormal MEA             | 31.7%   | 11,328 |
| Not ausculted            | 21.3%   | 7,607  |
| Not Lateral Recumbent    | 17.4%   | 6,228  |
| Heart Murmur Present     | 8.7%    | 3,126  |
| Arrhythmia Noted         | 4.9%    | 1,737  |
| Sedatives Given          | 4.4%    | 1,569  |
| P Duration Not Reported  | 3.2%    | 1,133  |
| P Amplitude Not Reported | 2.9%    | 1,024  |
| Atropine Given           | 2.1%    | 746    |
| Gender Not Reported      | 1.0%    | 354    |
| Alpha 2 Given            | 1.0%    | 349    |
| Gallop Present           | 0.5%    | 166    |

|                            |       |     |
|----------------------------|-------|-----|
| Age Not Reported           | 0.4%  | 128 |
| Anti-Arrhythmics Given     | 0.3%  | 107 |
| Weight Not Reported        | 0.2%  | 56  |
| QRS Duration Not Reported  | 0.1%  | 27  |
| R Amplitude Not Reported   | 0.1%  | 26  |
| Heart Rate Not Reported    | 0.1%  | 23  |
| Anxiety Level Not Reported | <0.1% | 5   |

---

**Supplemental Table 2.** Descriptive statistics for the top eight dog breeds for age (years), heart rate (BPM), MEA (degree), weight (Lbs), Gender, and anxiety. Continuous variables reported with median and interquartile range (IQR). Categorical variables reported at percent and sample size.

|                                      | Mixed Breed<br>(2,941)      | Chihuahua<br>(707)          | Labrador<br>Retriever<br>(675) | Yorkshire<br>Terrier (540)  | Shih Tzu<br>(497)           | Dachshund<br>(467)          | Golden<br>Retriever<br>(457) | American Pit<br>Bull Terrier<br>(360) |
|--------------------------------------|-----------------------------|-----------------------------|--------------------------------|-----------------------------|-----------------------------|-----------------------------|------------------------------|---------------------------------------|
| Age (Year),<br>median (IQR)          | 7.7<br>(2.2 - 10.5)         | 9.0<br>(6.8 - 11.4)         | 7.5<br>(2.2 - 10.1)            | 8.2<br>(5.0 - 10.8)         | 9.1<br>(6.1 - 11.6)         | 9.6<br>(7.0 - 12.1)         | 5.1<br>(1.0 - 9.4)           | 7.2<br>(4.2 - 9.8)                    |
| Heart Rate<br>(BPM),<br>median (IQR) | 132.0<br>(113.0 -<br>150.0) | 139.0<br>(122.0 -<br>160.0) | 123.0<br>(107.0 -<br>140.0)    | 136.0<br>(117.0 -<br>158.2) | 131.0<br>(115.0 -<br>149.0) | 136.0<br>(117.0 -<br>159.0) | 116.0<br>(101.0 -<br>131.0)  | 134.0<br>(121.0 - 154.0)              |
| MEA<br>(degree),<br>median (IQR)     | 67.0<br>(55.0 - 78.0)       | 60.0<br>(50.0 - 72.0)       | 72.0<br>(60.0 - 83.0)          | 63.0<br>(53.0 - 74.0)       | 67.0<br>(57.0 - 78.0)       | 67.0<br>(53.0 - 77.0)       | 77.0<br>(66.0 - 84.0)        | 61.0<br>(52.0 - 73.0)                 |
| Weight (Lb),<br>median (IQR)         | 34.8<br>(17.2 - 58.4)       | 9.4<br>(7.0 - 12.6)         | 73.0<br>(62.0 - 84.1)          | 8.0<br>(6.0 - 11.3)         | 14.0<br>(11.4 - 17.6)       | 14.9<br>(12.0 - 18.0)       | 70.5<br>(60.0 - 81.0)        | 63.1<br>(53.4 - 73.0)                 |

**Gender, %****(n)**

|                   |             |             |             |             |             |             |             |             |
|-------------------|-------------|-------------|-------------|-------------|-------------|-------------|-------------|-------------|
| Female            | 20.6% (607) | 19.8% (140) | 24.1% (163) | 19.4% (105) | 17.7% (88)  | 15.6% (73)  | 24.3% (111) | 18.6% (67)  |
| Female,<br>Spayed | 29.8% (875) | 33.1% (234) | 27.3% (184) | 29.1% (157) | 33.4% (166) | 33.4% (156) | 26.0% (119) | 35.0% (126) |
| Male              | 21.6% (634) | 15.8% (112) | 25.2% (170) | 20.9% (113) | 17.9% (89)  | 15.0% (70)  | 31.7% (145) | 19.4% (70)  |
| Male,<br>Neutered | 28.1% (825) | 31.3% (221) | 23.4% (158) | 30.6% (165) | 31.0% (154) | 36.0% (168) | 17.9% (82)  | 26.9% (97)  |

**Anxiety, %****(n)**

|                             |              |             |             |             |             |             |             |             |
|-----------------------------|--------------|-------------|-------------|-------------|-------------|-------------|-------------|-------------|
| Not<br>anxious/very<br>calm | 6.4% (188)   | 5.5% (39)   | 10.2% (69)  | 5.9% (32)   | 7.0% (35)   | 8.8% (41)   | 18.2% (83)  | 6.4% (23)   |
| Average<br>Anxiety          | 61.6% (1812) | 60.4% (427) | 60.6% (409) | 60.7% (328) | 66.2% (329) | 65.7% (307) | 59.5% (272) | 63.3% (228) |

|                            |             |             |             |             |             |             |             |             |
|----------------------------|-------------|-------------|-------------|-------------|-------------|-------------|-------------|-------------|
| Very anxious<br>or nervous | 32.0% (941) | 34.1% (241) | 29.2% (197) | 33.3% (180) | 26.8% (133) | 25.5% (119) | 22.3% (102) | 30.3% (109) |
|----------------------------|-------------|-------------|-------------|-------------|-------------|-------------|-------------|-------------|

---

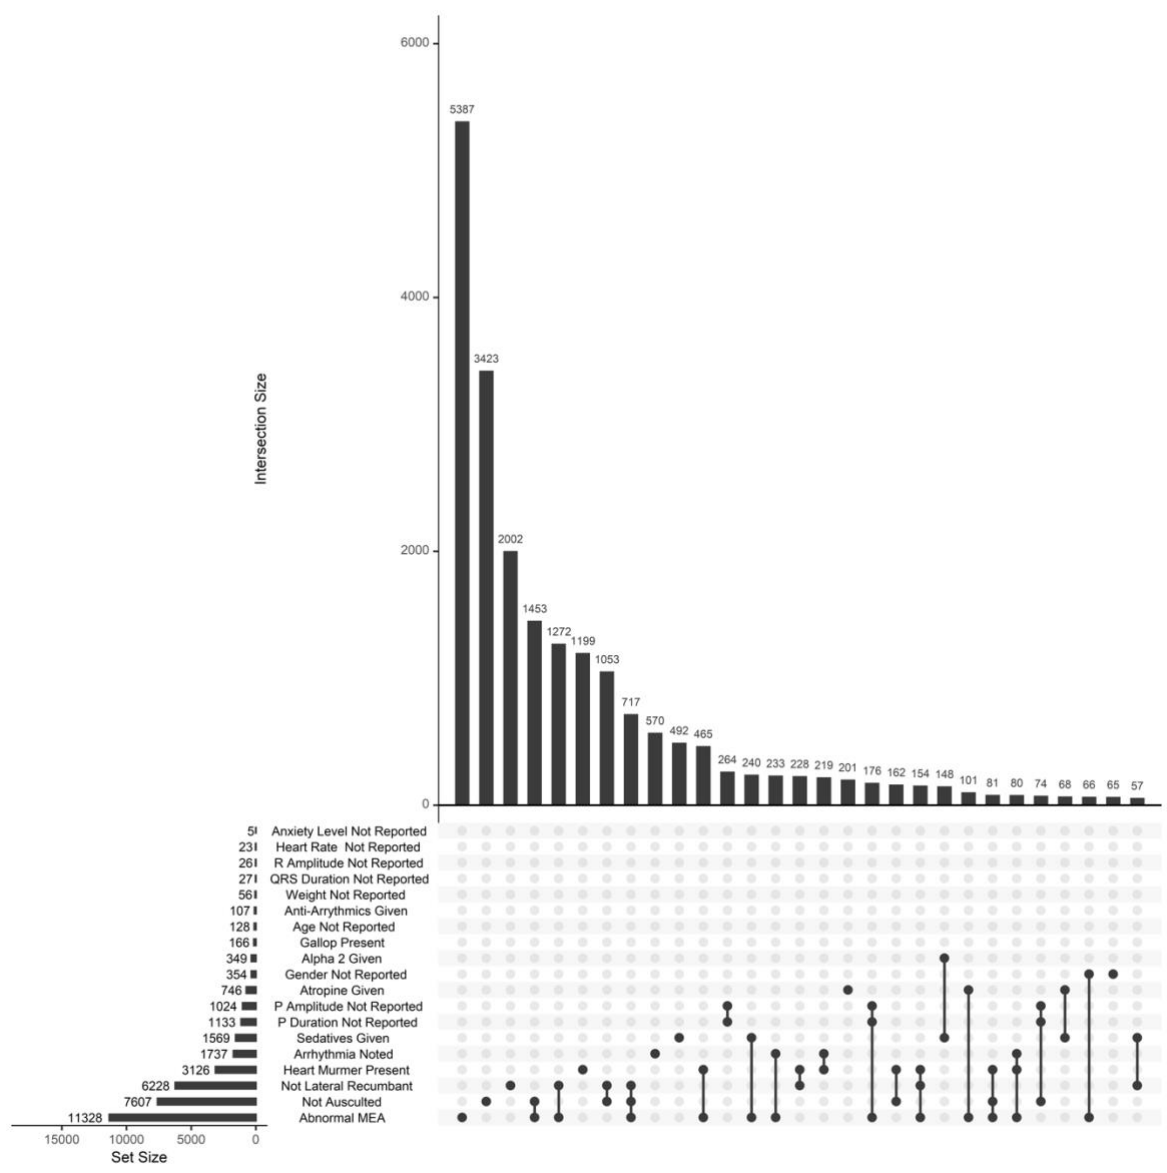

**Supplementary Figure S1.** Attribute plot for exclusion criteria. Only intersections with a size greater than 50 ( $n > 50$ ) are shown.

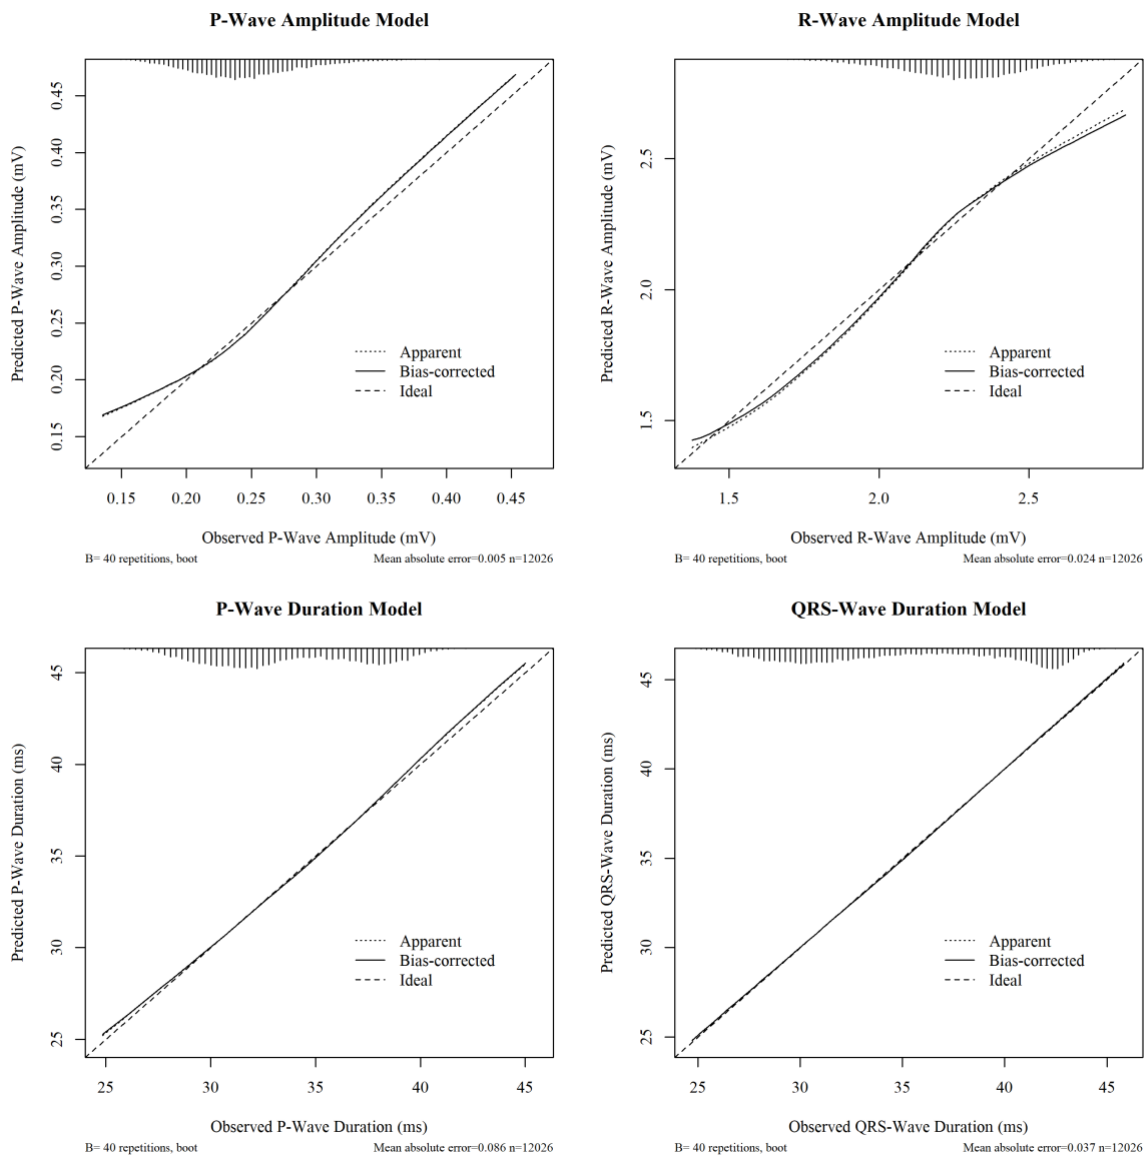

**Supplementary Figure S2.** Calibration curves of the four ECG parameter models (Top Left: P-Wave Amplitude, Top Right: R-Wave Amplitude, Bottom Left: P-Wave Duration, Bottom Right: QRS Duration). Calibration Curves for the four ECG parameter models. The dashed black line represents a perfect “ideal” fit (slope = 1.0, intercept = 0.0), the dotted line represents the actual fit and the solid line represents the bias-corrected fit. At the top of the figure is a histogram of the observed ECG waveform measurements.

### Supplemental Methods

At the request of the reviewers, a *post-hoc* exploratory analysis of the five ECG waveform models was conducted with the addition of breed as a covariate. Multivariable-adjusted linear regression analyses were used to model a flexible association between each of the five ECG waveform measurements (P amplitude, R amplitude, P-wave duration, R-wave duration, and QRS-wave duration). Continuous covariates consisted of age, weight, MEA, and heart rate (all modeled using restricted cubic splines). Categorical covariates consisted of reported anxiety level (three levels), sex (two levels), and breed (183 levels). Knot selection for restricted cubic splines was previously described (see methods). Compared to the pre-defined models described in the study, the addition of the breed variable led to an increase in AIC (i.e. the increase in model complexity decreased model



fit and performance). Only model output for the two most populous breeds: Chihuahua (Supplemental Figures S4-S7) and Labrador Retrievers (Supplemental Figures S8-S11) are shown. Due to the differences in size of breeds shown, only the range of the data for weight and age were used when plotting the model output. For Chihuahuas the range of age was 0.5 to 14.6 years, and the range of weight was 0.8 to 15.8 lbs. For Labrador Retrievers the range of age was 1.0 to 13.8 years, and the range of weight was 4.8 to 106 lbs.

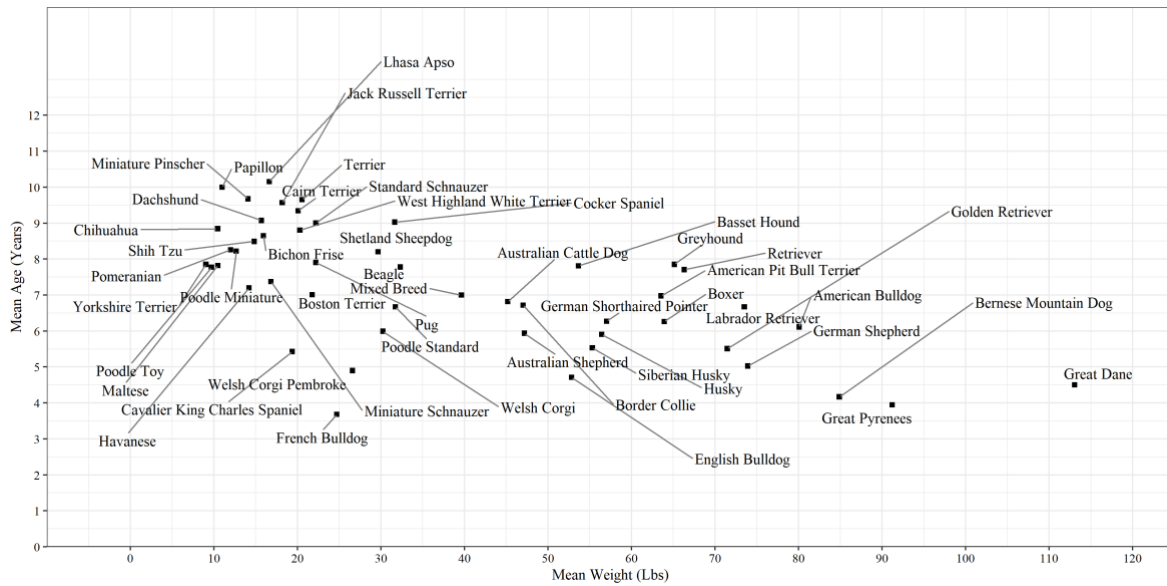

**Supplemental Figure S3.** Scatter plot of the mean age (years) and mean weight (Lbs) by dog breed. Only breed categories with a sample size > 40 records were plotted to ensure visibility.

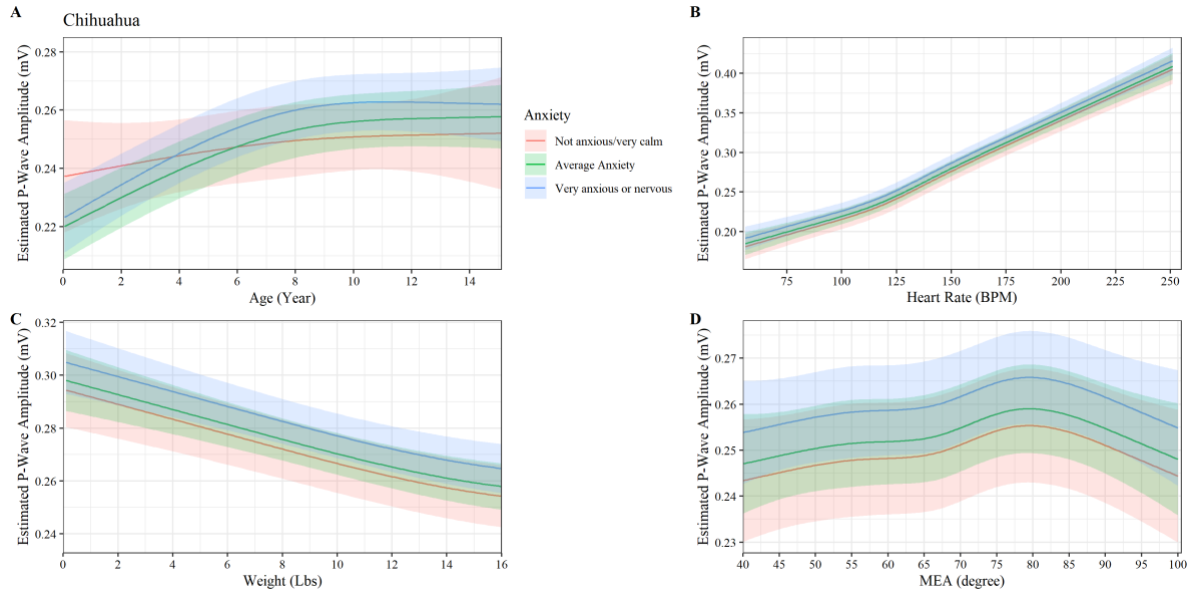

**Supplemental Figure S4.** Plot of the p-wave amplitude (mV) versus A) age, B) heart rate, C) weight, and D) MEA by anxiety for “Chihuahua” breed category. The y axis shows the estimated p-wave amplitude from the fully adjusted model for observed values while holding the values of covariates at their referent values. The curves display the trend in p-wave amplitude with increase age, heart rate, weight, and MEA. Shaded regions represent the 95% confidence interval of the prediction estimates from the regression model.

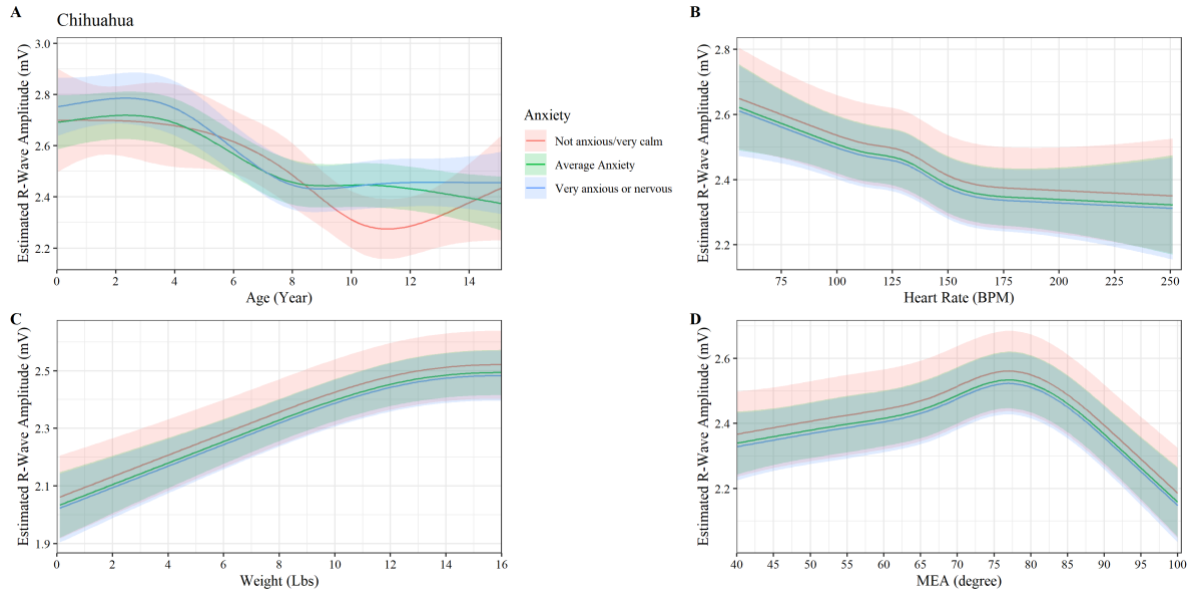

**Supplemental Figure S5.** Plot of the r-wave amplitude (mV) versus A) age, B) heart rate, C) weight, and D) MEA by anxiety for “Chihuahua” breed category. The y axis shows the estimated r-wave amplitude from the fully adjusted model for observed values while holding the values of covariates at their referent values. The curves display the trend in r-wave amplitude with increase age, heart rate, weight, and MEA. Shaded regions represent the 95% confidence interval of the prediction estimates from the regression model.

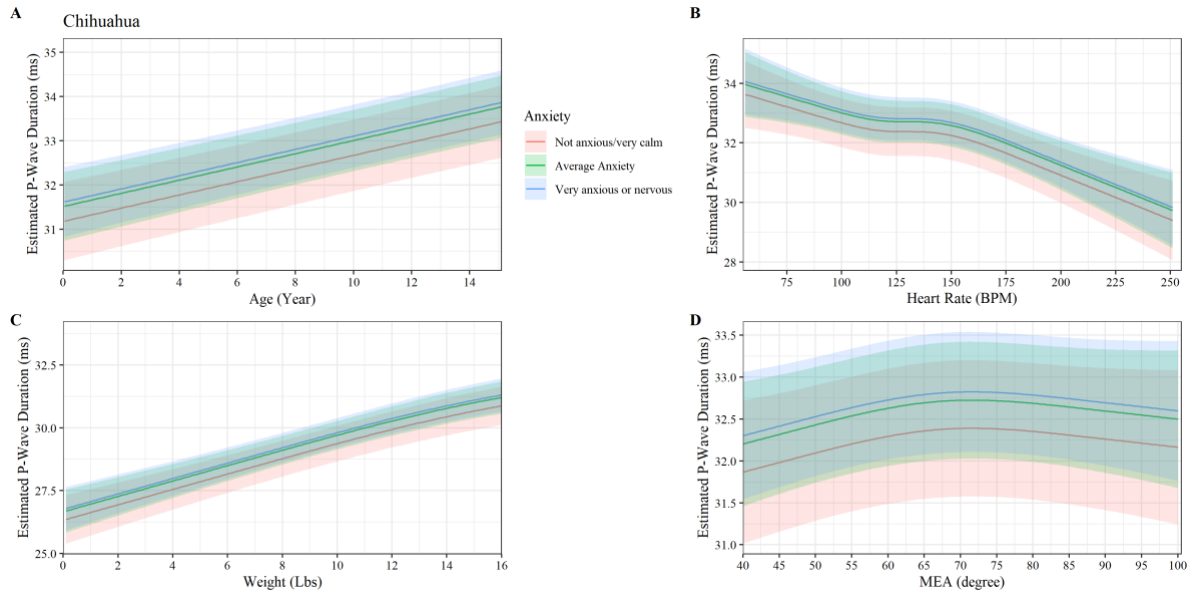

**Supplemental Figure S6.** Plot of the p-wave duration (ms) versus A) age, B) heart rate, C) weight, and D) MEA by anxiety for “Chihuahua” breed category. The y axis shows the estimated p-wave duration from the fully adjusted model for observed values while holding the values of covariates at their referent values. The curves display the trend in p-wave duration with increase age, heart rate, weight, and MEA. Shaded regions represent the 95% confidence interval of the prediction estimates from the regression model.

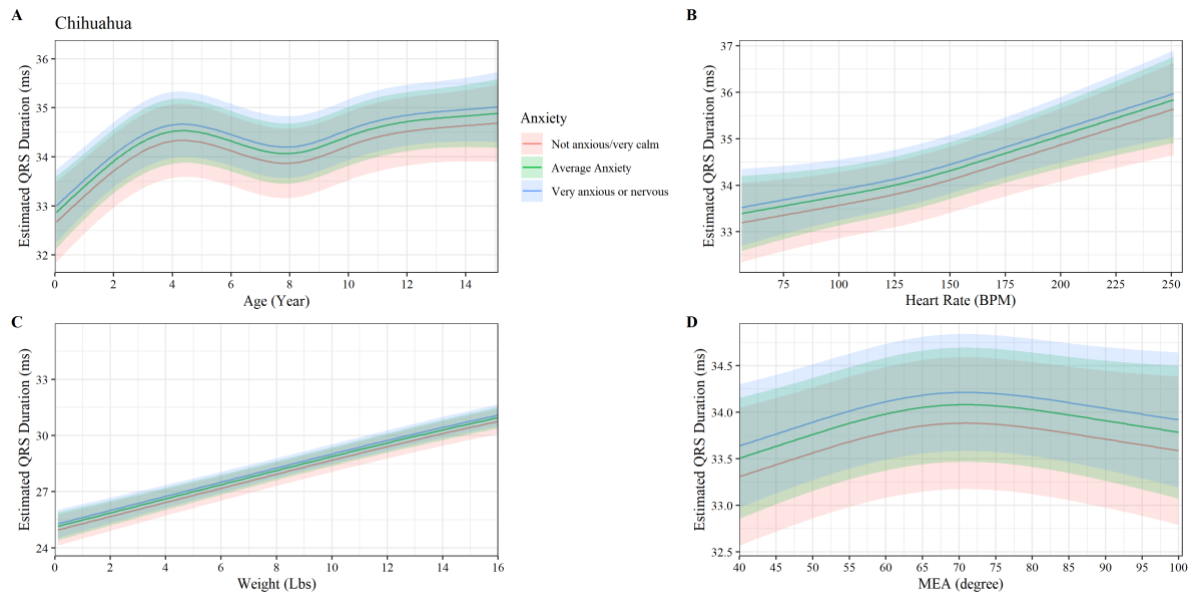

**Supplemental Figure S7.** Plot of the QRS-wave duration (ms) versus A) age, B) heart rate, C) weight, D) MEA by anxiety for “Chihuahua” breed category. The y axis shows the estimated QRS - wave duration from the fully adjusted model for observed values while holding the values of covariates at their referent values. The curves display the trend in QRS-wave duration with increase age, heart rate, weight, and MEA. Shaded regions represent the 95% confidence interval of the prediction estimates from the regression model.

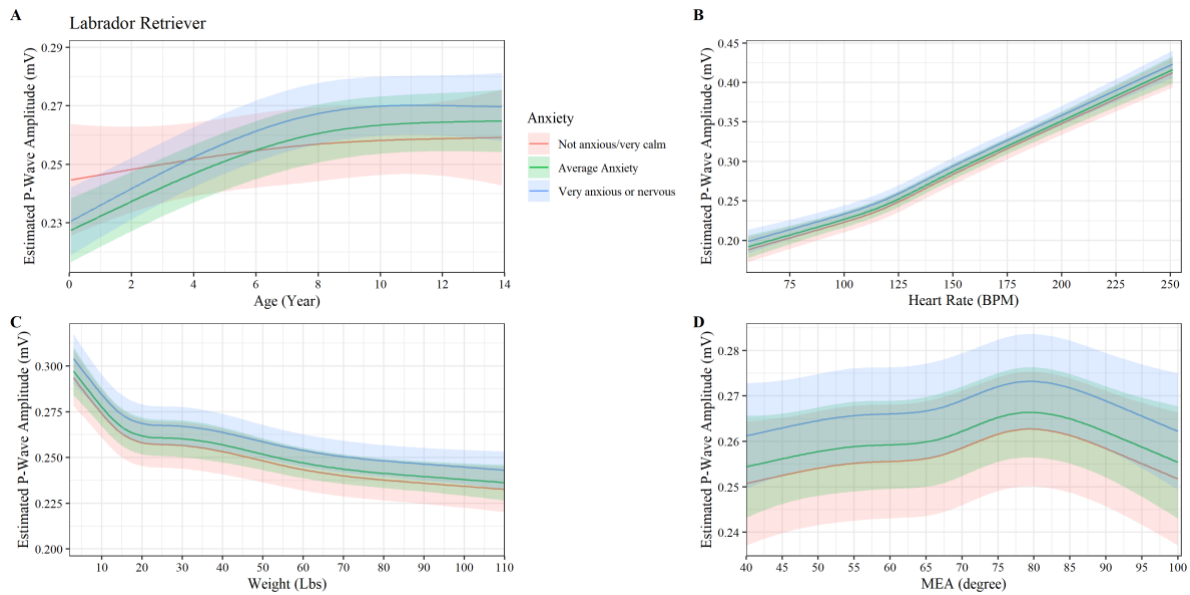

**Supplemental Figure S8.** Plot of the p-wave amplitude (mV) versus A) age, B) heart rate, C) weight, and D) MEA by anxiety for “Labrador Retriever” breed category. The y axis shows the estimated p-wave amplitude from the fully adjusted model for observed values while holding the values of covariates at their referent values. The curves display the trend in p-wave amplitude with increase age, heart rate, weight, and MEA. Shaded regions represent the 95% confidence interval of the prediction estimates from the regression model.

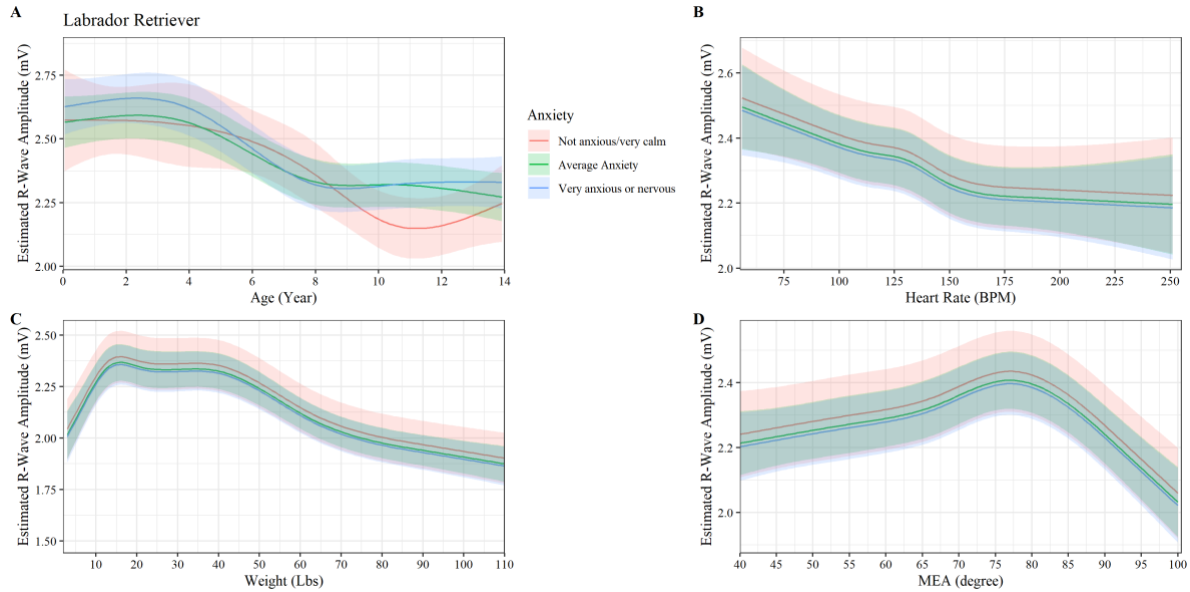

**Supplemental Figure S9.** Plot of the r-wave amplitude (mV) versus A) age, B) heart rate, C) weight, and D) MEA by anxiety for “Labrador Retriever” breed category. The y axis shows the estimated r-wave amplitude from the fully adjusted model for observed values while holding the values of covariates at their referent values. The curves display the trend in r-wave amplitude with increase age, heart rate, weight, and MEA. Shaded regions represent the 95% confidence interval of the prediction estimates from the regression model.



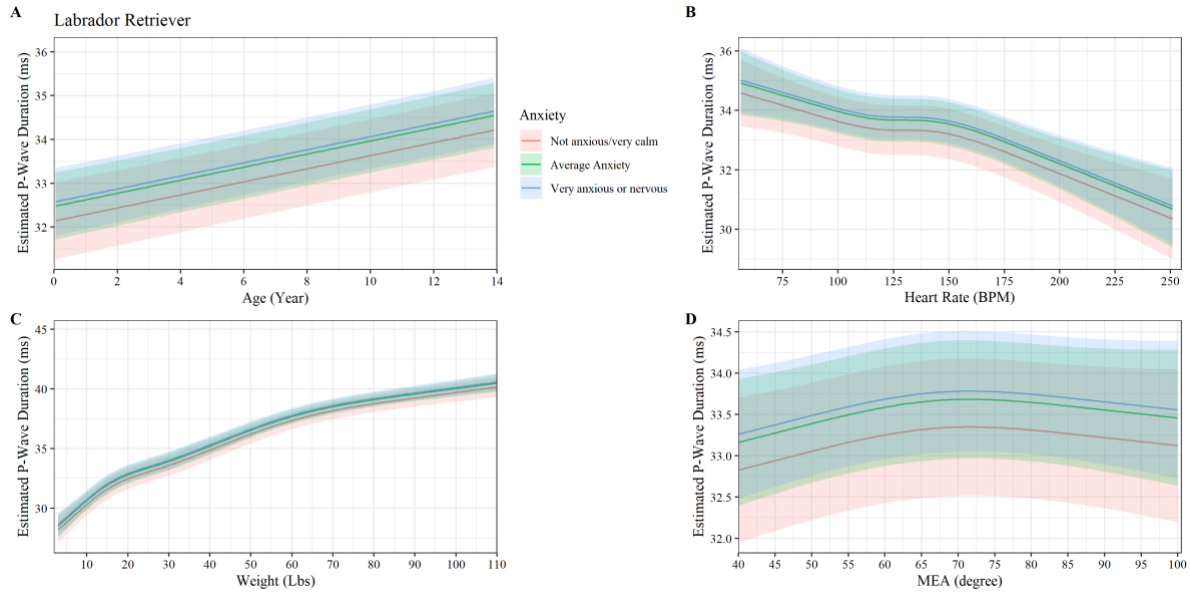

**Supplemental Figure S10.** Plot of the p-wave duration (ms) versus A) age, B) heart rate, C) weight, and D) MEA by anxiety for “Labrador Retriever” breed category. The y axis shows the estimated p-wave duration from the fully adjusted model for observed values while holding the values of covariates at their referent values. The curves display the trend in p-wave duration with increase age, heart rate, weight, and MEA. Shaded regions represent the 95% confidence interval of the prediction estimates from the regression model.

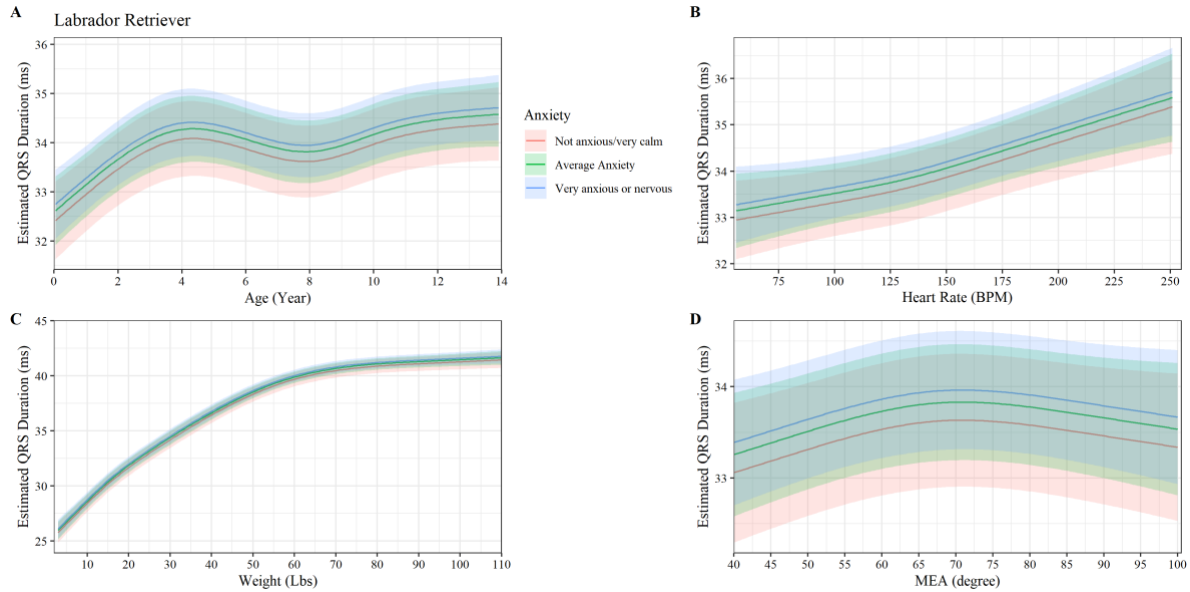

**Supplemental Figure S11.** Plot of the QRS-wave duration (ms) versus A) age, B) heart rate, C) weight, D) MEA by anxiety for “Labrador Retriever” breed category. The y axis shows the estimated QRS -wave duration from the fully adjusted model for observed values while holding the values of covariates at their referent values. The curves display the trend in QRS-wave duration with increase age, heart rate, weight, and MEA. Shaded regions represent the 95% confidence interval of the prediction estimates from the regression model.
